# Supplementary material for: A biallelic mutation in IL6ST encoding the GP130 co-receptor causes immunodeficiency and craniosynostosis
Source: PubMed Central journal article supplement (PMC5584118; doi:10.1084/jem.20161810), 2017-09-04
Supplement: JEM_20161810_sm.pdf [file JEM_20161810_sm.pdf]

SUPPLEMENTAL MATERIAL

Schwerd et al., <https://doi.org/10.1084/jem.20161810>

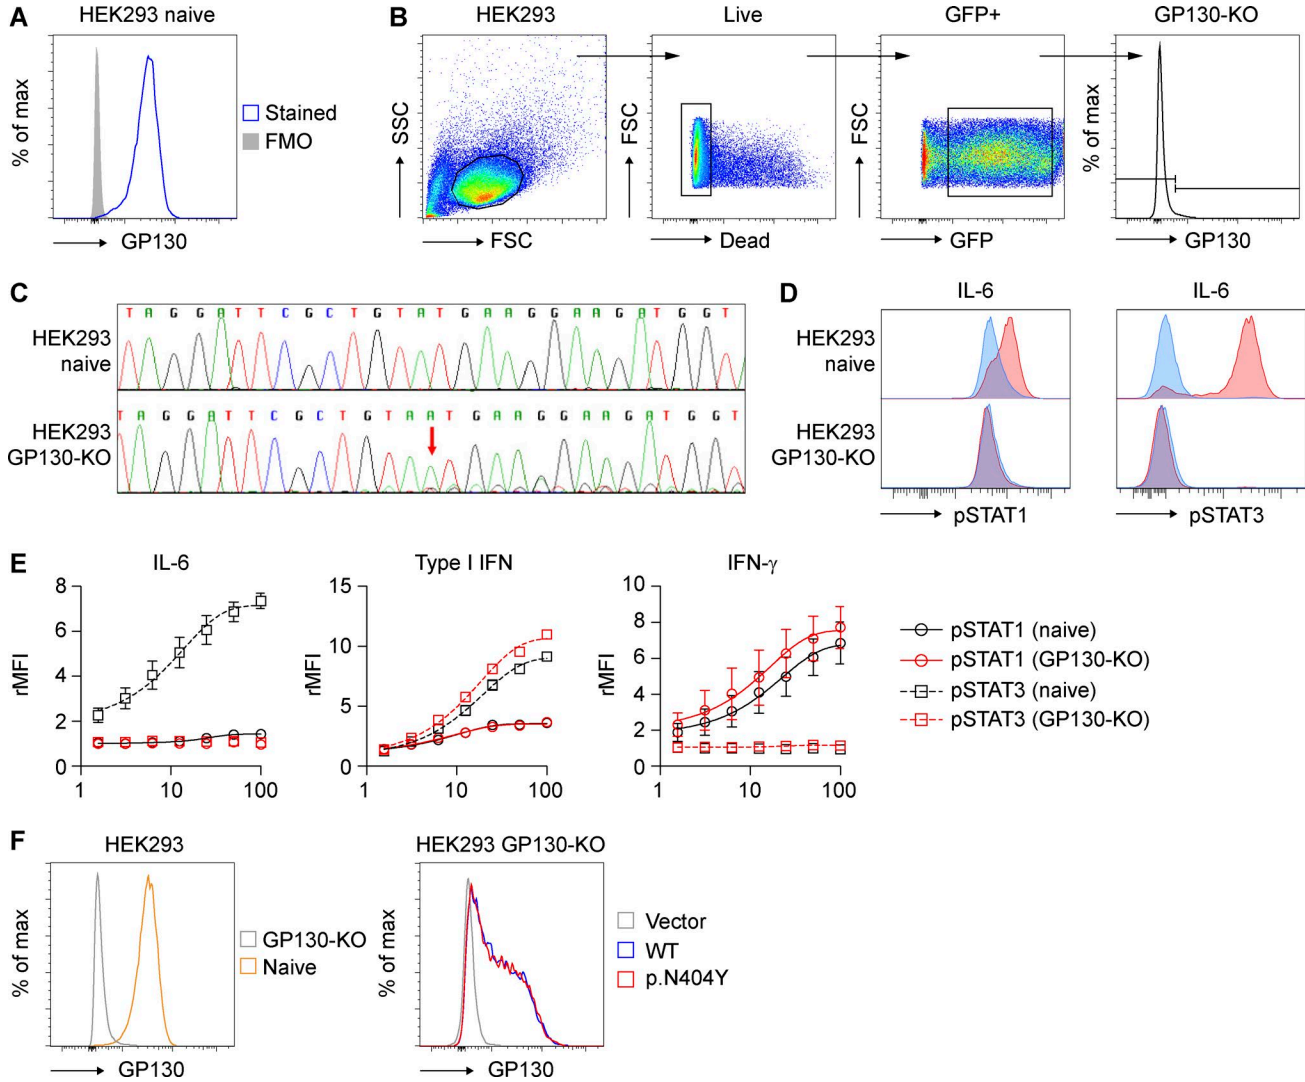

**Figure S1. CRISPR/Cas9-mediated GP130-KO abrogates IL-6 signaling and does not affect signaling of GP130-independent cytokines.** (A) Naive HEK293 cells express GP130. FMO, fluorescence minus one. (B) Loss of GP130 expression in CRISPR/Cas9-transfected HEK293 cells. HEK293 cells were transfected with plasmid encoding CRISPR/Cas9, a GFP reporter, and gRNA directed against GP130. Live GFP<sup>+</sup> cells were analyzed for GP130 expression 6 d after transfection. FSC, forward scatter; SSC, side scatter. (C) Dideoxy sequencing confirms CRISPR/Cas9-mediated gene disruption by a homozygous frame-shift insertion of A (red arrow) in *IL6ST* exon 8. (D) Functional validation of the GP130-KO cell line using flow cytometry analysis of phospho-STAT1 (pSTAT1) and phospho-STAT3 (pSTAT3). Naive and GP130-KO cells were stimulated with 10 ng/ml IL-6 for 15 min. (E) Stimulation of the HEK293 parent cell line and HEK293 GP130-KO cells with GP130-independent cytokines at the indicated concentrations (ng/ml) results in comparable levels of pSTAT1 and pSTAT3. WT and GP130-KO cells were stimulated with type I IFN and IFN- $\gamma$  for 15 min, and STAT1/3 phosphorylation was assessed by flow cytometry. Stimulation with IL-6, a GP130-dependent cytokine, shows abrogated signaling in the GP130 KO cell line. Stimulation of HEK293 cells with FGF, EGF (epidermal growth factor), IL-10, and IL-22 did not result in STAT1 or STAT3 phosphorylation, in neither WT cells nor in GP130-KO cells (not depicted). Data represent mean with SEM. Results are based on four (type I IFN), five (IFN- $\gamma$ ), and six (IL-6) replicates from four independent experiments. rMFI, relative mean fluorescence intensity. (F) Transient overexpression of GP130 WT and mutants in HEK293 GP130-KO cells results in comparable surface expression. (Left) GP130 gene disruption by CRISPR/Cas9 in HEK293 cells results in absence of GP130 surface expression. (Right) Flow cytometric analysis of HEK293 GP130-KO cells transfected with empty vector control or plasmids encoding GP130 WT or the patient variant p.N404Y. Cells were stained for GP130 surface expression 24 h after transfection. Results are representative of three independent experiments. Compared with 24 h, transfection for 48 h results in overall decreased GP130 expression but still equal levels between WT and p.N404Y (not depicted). All experiments with transient overexpression of GP130 were performed after 24 h.

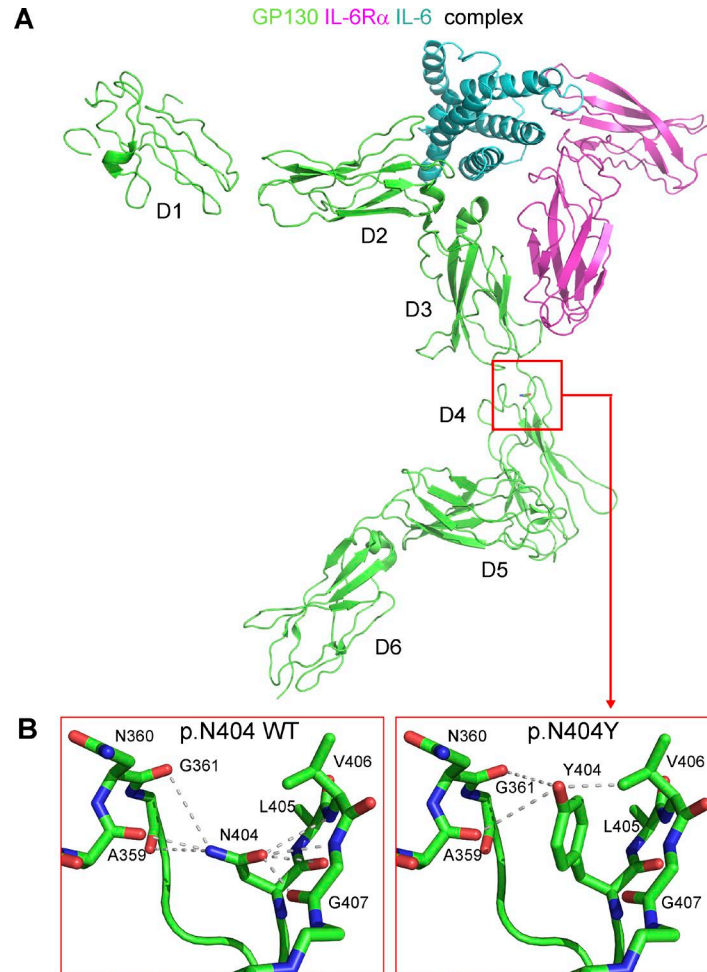

Figure S2. **Structural analysis of the IL-6ST substitution.** (A) Model of the IL-6/IL-6RA/GP130 D1–D6 tripartite complex in cartoon representation, obtained from an overlay of the published IL-6/IL-6RA/GP130 D1–D3 crystal structure (Boulanger et al., 2003; PDB accession no. 1P9M) onto the respective domains of the GP130 D1–D6 crystal structure of the full ectodomain (Xu et al., 2010; PDB accession no. 3L5H). The GP130 molecule is colored in light green, the IL-6RA in magenta, and the IL-6 in cyan. (B) Cartoon and sticks illustration of the GP130 D4  $\beta$ -turn containing either p.N404 or the p.N404Y substitution. Dotted lines indicate potential intramolecular hydrogen bonding networks.

Table S1. Likely homozygous nonsynonymous variants in P1 identified by exome sequencing

| Gene                     | Nucleotide and amino acid change | ESP6500 <sup>a</sup> | 1000g2012 <sup>b</sup> | dbSNP137 <sup>c</sup> | Del Score <sup>d</sup> | CADD score <sup>d</sup> | Chr | Position  |
|--------------------------|----------------------------------|----------------------|------------------------|-----------------------|------------------------|-------------------------|-----|-----------|
| <i>IL6ST</i>             | NM_001190981:c.1210A>T;p.N404Y   |                      |                        |                       | 6                      | 27.2                    | 5   | 55251910  |
| <i>MED15</i>             | NM_015889:c.2132C>T;p.S711L      |                      |                        |                       | 5                      | 23.1                    | 22  | 20940876  |
| <i>MFSD6L</i>            | NM_152599:c.1720G>A;p.D574N      | 0.007919             | 0.0037                 | rs78093130            | 5                      | 32                      | 17  | 8700719   |
| <i>SEMA5B</i>            | NM_001256348:c.1127A>G;p.N376S   |                      |                        |                       | 5                      | 20.8                    | 3   | 122641266 |
| <i>LAMA1</i>             | NM_005559:c.3838G>A;p.G1280R     |                      |                        |                       | 5                      | 25.4                    | 18  | 7010234   |
| <i>NUDT9</i>             | NM_001248011:c.416C>A;p.A139E    |                      |                        |                       | 5                      | 32                      | 4   | 88363049  |
| <i>ARHGAP24</i>          | NM_031305:c.1774G>A;p.D592N      |                      |                        |                       | 4                      | 29.3                    | 4   | 86921681  |
| <i>COL10A1</i>           | NM_000493:c.382G>A;p.D128N       | 0.000692             | 0.0023                 | rs142463796           | 4                      | 17.21                   | 6   | 116442897 |
| <i>CHST6</i>             | NM_021615:c.993G>T;p.Q331H       | 0.001231             | 0                      | rs140699573           | 4                      | 27.4                    | 16  | 75512734  |
| <i>TDRD5</i>             | NM_001199085:c.151C>T;p.R51W     | 0.000077             | 0.0009                 | rs138668107           | 4                      | 32                      | 1   | 179561901 |
| <i>OSBPL10</i>           | NM_001174060:c.364C>G;p.L122V    |                      |                        |                       | 4                      | 23                      | 3   | 31921240  |
| <i>TNN</i>               | NM_022093:c.2062G>T;p.V688L      | 0.000154             | 0.0005                 | rs149504279           | 3                      | 25.7                    | 1   | 175067674 |
| <i>SENP5</i>             | NM_152699:c.1340C>A;p.S447Y      |                      |                        | rs202085742           | 3                      | 22.5                    | 3   | 196613392 |
| <i>SMG7</i>              | NM_001174061:c.591G>C;p.E197D    |                      |                        |                       | 3                      | 27.2                    | 1   | 183498542 |
| <i>IRS1</i>              | NM_005544:c.3304G>A;p.E1102K     |                      |                        |                       | 3                      | 25.7                    | 2   | 227660151 |
| <i>ZNF451</i>            | NM_001031623:c.2261G>A;p.R754H   |                      |                        |                       | 3                      | 23.8                    | 6   | 57013144  |
| <i>CHIT1</i>             | NM_001256125:c.119G>A;p.R40H     | 0.009842             | 0.02                   | rs35920428            | 3                      | 23.6                    | 1   | 203194935 |
| <i>TDRD6</i>             | NM_001010870:c.3230A>G;p.D1077G  | 0.000077             |                        | rs141532119           | 3                      | 23.7                    | 6   | 46659095  |
| <i>SF3B2</i>             | NM_006842:c.151G>A;p.V51M        |                      |                        |                       | 3                      | 29.4                    | 11  | 65820161  |
| <i>SCFD2</i>             | NM_152540:c.938C>T;p.A313V       | 0.001768             | 0.0005                 | rs147606542           | 2                      | 13.64                   | 4   | 54218834  |
| <i>CHIT1</i>             | NM_001256125:c.707C>G;p.T236S    | 0.008765             | 0.02                   | rs61745299            | 2                      | 18.76                   | 1   | 203188943 |
| <i>SMC1B</i>             | NM_148674:c.2874A>C;p.E958D      |                      |                        | rs199833095           | 2                      | 16.59                   | 22  | 45754664  |
| <i>WDR4</i>              | NM_001260474:c.70G>T;p.A24S      | 0.000154             | 0.0005                 | rs150449975           | 2                      | 32                      | 21  | 44299536  |
| <i>LRRC37A</i>           | NM_014834:c.3423C>A;p.F1141L     |                      |                        | rs1863115             | 2                      | 21.3                    | 17  | 44408066  |
| <i>NPSR1</i>             | NM_207172:c.380T>C;p.L127S       |                      |                        |                       | 2                      | 25.1                    | 7   | 34818173  |
| <i>CORO1B</i>            | NM_020441:c.650C>G;p.A217G       |                      |                        |                       | 2                      | 9.17                    | 11  | 67208702  |
| <i>ABL2</i>              | NM_001136000:c.70C>A;p.L24M      |                      |                        | rs202125612           | 2                      | 7.39                    | 1   | 179112110 |
| <i>DOCK8<sup>e</sup></i> | NM_001190458:c.459C>A;p.D153E    | 0.002384             |                        | rs139391329           | 1                      | 5.293                   | 9   | 312088    |
| <i>ZSCAN16</i>           | NM_025231:c.989G>A;p.R330Q       |                      |                        |                       | 1                      | 24.8                    | 6   | 28097670  |
| <i>PPME1</i>             | NM_016147:c.215G>A;p.S72N        | 0.000084             |                        |                       | 1                      | 22.4                    | 11  | 73915417  |
| <i>DST</i>               | NM_001723:c.6007G>A;p.A2003T     |                      | 0.0005                 | rs74874398            | 1                      | 8.23                    | 6   | 56482825  |
| <i>TBC1D10A</i>          | NM_001204240:c.1433C>T;p.P478L   | 0.000231             |                        | rs201271557           | 1                      | 0.246                   | 22  | 30688479  |
| <i>CTRB1</i>             | NM_001906:c.37G>A;p.V13M         |                      |                        |                       | 1                      | 6.79                    | 16  | 75252942  |
| <i>KIAA0040</i>          | NM_001162895:c.31A>G;p.I11V      | 0.012046             | 0.01                   | rs116333252           | 0                      | 0.032                   | 1   | 175130119 |
| <i>MFSD6L</i>            | NM_152599:c.625G>A;p.A209T       | 0.00246              | 0.0009                 | rs144238966           | 0                      | 3.486                   | 17  | 8701814   |
| <i>EYS</i>               | NM_001142800:c.8422G>A;p.A2808T  | 0.00657              | 0.01                   | rs111991705           | 0                      | 13.78                   | 6   | 64431505  |
| <i>MFSD6L</i>            | NM_152599:c.1195G>A;p.G399S      | 0.002691             | 0.0032                 | rs138080986           | 0                      | 0.031                   | 17  | 8701244   |
| <i>EFCAB12</i>           | NM_207307:c.949G>A;p.D317N       | 0.013588             | 0.04                   | rs75410160            | 0                      | 8.242                   | 3   | 129130087 |
| <i>TWISTNB</i>           | NM_001002926:c.752C>G;p.A251G    |                      |                        |                       | 0                      | 10.24                   | 7   | 19738204  |
| <i>MFSD6L</i>            | NM_152599:c.1124C>T;p.T375I      | 0.002768             | 0.0009                 | rs111767864           | 0                      | 4.83                    | 17  | 8701315   |
| <i>AHNAK2</i>            | NM_138420:c.2239C>A;p.P747T      |                      | 0.01                   | rs117125675           | 0                      | 0.004                   | 14  | 105419549 |
| <i>AHNAK2</i>            | NM_138420:c.2178G>C;p.Q726H      | 0.000164             | 0.01                   | rs117226478           | 0                      | 22.7                    | 14  | 105419610 |
| <i>MUC4</i>              | NM_018406:c.12160G>A;p.A4054T    |                      |                        |                       | 0                      | 0.15                    | 3   | 195506291 |
| <i>SAG</i>               | NM_000541:c.511A>G;p.K171E       |                      |                        |                       | 0                      | 21.9                    | 2   | 234235842 |
| <i>KHDC1L</i>            | NM_001126063:c.47T>C;p.L16P      |                      |                        |                       | 0                      | 22.5                    | 6   | 73935085  |
| <i>PLA2G7</i>            | NM_001168357:c.545G>T;p.R182I    | 0.000077             |                        | rs146433848           | 0                      | 11.72                   | 6   | 46679351  |
| <i>DNAH11</i>            | NM_001277115:c.11756C>T;p.T3919I |                      |                        |                       | 0                      | -                       | 7   | 21907521  |
| <i>LRRC37A</i>           | NM_014834:c.4612A>G;p.K1538E     |                      |                        | rs62073249            | 0                      | 11.2                    | 17  | 44409255  |
| <i>ANKRD6</i>            | NM_001242814:c.263C>T;p.T88M     |                      |                        |                       | 0                      | 22.2                    | 6   | 90312791  |

<sup>a</sup>ESP6500, variant frequency from the NHLBI Exome Sequencing Project.

<sup>b</sup>1000g2012, variant frequency from the 1000 Genomes Project.

<sup>c</sup>dbSNP137, annotation in build 137 of dbSNP.

<sup>d</sup>The severity of amino acid substitutions (Del = deleterious) was predicted using a combination of the following six metrics: Polyphen2, SIFT, PhyloP, LRT, Mutation Taster, and GERP++ (Fu et al., 2013), or using combined annotation-dependent depletion (CADD) scores (Kircher et al., 2014).

<sup>e</sup>This *DOCK8* variant was considered unlikely to be a major contributor to the phenotype of P1 for the following reasons: (a) The clinical phenotype of P1 is not typical for *DOCK8*-HIES. P1 presented with four of the five criteria that are typical for *STAT3* signaling defects (lung abnormalities, eosinophilia, upper respiratory infections, and retained primary teeth) but not *DOCK8* (Engelhardt et al., 2015). (b) The *DOCK8* variant is found at an allele frequency of ~0.2% in non-Finnish Europeans and the South Asian population, yet is not described as pathogenic in the *DOCK8* literature (Engelhardt et al., 2015). (c) The low del and CADD scores of the *DOCK8* variant are not strongly suggestive of pathogenicity. (d) As described here, the *STAT3*-associated cytokine signaling defect in P1 was rescued by WT GP130 transfection, confirming the causal role of the *IL6ST* variant.

## REFERENCES

- Boulanger, M.J., D.C. Chow, E.E. Brevnova, and K.C. Garcia. 2003. Hexameric structure and assembly of the interleukin-6/IL-6  $\alpha$ -receptor/gp130 complex. *Science*. 300:2101–2104. <http://dx.doi.org/10.1126/science.1083901>
- Engelhardt, K.R., M.E. Gertz, S. Keles, A.A. Schäffer, E.C. Sigmund, C. Glocker, S. Saghafi, Z. Pourpak, R. Ceja, A. Sassi, et al. 2015. The extended clinical phenotype of 64 patients with dedicator of cytokinesis 8 deficiency. *J. Allergy Clin. Immunol.* 136:402–412. <http://dx.doi.org/10.1016/j.jaci.2014.12.1945>
- Fu, W., T.D. O'Connor, G. Jun, H.M. Kang, G. Abecasis, S.M. Leal, S. Gabriel, M.J. Rieder, D. Altshuler, J. Shendure, et al. NHLBI Exome Sequencing Project. 2013. Analysis of 6,515 exomes reveals the recent origin of most human protein-coding variants. *Nature*. 493:216–220. <http://dx.doi.org/10.1038/nature11690>
- Kircher, M., D.M. Witten, P. Jain, B.J. O'Roak, G.M. Cooper, and J. Shendure. 2014. A general framework for estimating the relative pathogenicity of human genetic variants. *Nat. Genet.* 46:310–315. <http://dx.doi.org/10.1038/ng.2892>
- Xu, Y., N.J. Kershaw, C.S. Luo, P. Soo, M.J. Pocock, P.E. Czabotar, D.J. Hilton, N.A. Nicola, T.P. Garrett, and J.G. Zhang. 2010. Crystal structure of the entire ectodomain of gp130: insights into the molecular assembly of the tall cytokine receptor complexes. *J. Biol. Chem.* 285:21214–21218. <http://dx.doi.org/10.1074/jbc.C110.129502>
